# Supplementary material for: Epigenetic Signatures of Smoking in Five Brain Regions
Source: J Pers Med. 2022 Apr 2;12(4):566. doi: 10.3390/jpm12040566 (PMC9029407; doi:10.3390/jpm12040566)
Supplement: Supplementary file 1 [file jpm-12-00566-s001.zip › Supplementary_Tables.xlsx]

## Sheet: S1
Supplementary Table S1
Number of samples for each brain region and blood investigated in the present study
		Smokers				Non-smokers
		NSWTRC	NSWTRC	NSWTRC	UTHealth	NSWTRC	NSWTRC	NSWTRC	UTHealth
Tissue	N total	Batch 1	Batch 2	Batch 3		Batch 1	Batch 2	Batch 3
ACC	38	24	-	-	-	14	-	-	-
BA9	77	21	-	19	7	13	-	12	5
CN	68	24	18	-	-	14	12	-	-
PUT	68	-	42	-	-	-	26	-	-
VS	65	24	16	-	-	13	12	-	-
Blood	10	-	-	-	6	-	-	-	4

## Sheet: S2
Supplementary Table S2
Summary table displaying cause of death of sample donors
Characteristic	Smokers	Non-smokers
Cause of death
Cardiac	14	9
Cardiovascular	14	8
Toxicity	2	4
Vascular	2	0
Infection	2	0
COPD	2	0
Hepatic	1	1
Hepatic/Blood loss	1	1
Cardiac/Hepatic	1	0
Cardiovascular/Respiratory	1	0
Respiratory	0	1
Suicide	0	1
Pancreatic	1	0
Carcinoma	0	1
missing	16	9

## Sheet: S3
Supplementary Table S3
EWAS sample sizes, number of assessed CpG sites, genomic inflation factors, and 5% FDR thresholds
Region	N samples	N CpG	Genomic inflation	FDR 5% threshold
ACC	38	657 593	0.813	1.52e-07
BA9	72	653 296	0.922	7.65e-08
CN	68	648 878	0.870	7.71e-08
PUT	68	694 571	0.924	7.20e-08
VS	65	663 385	1.152	7.54e-08

## Sheet: S4a
Supplementary Table S4A
Top 10 smoking-associated CpG sites in the anterior cingulate cortex
	Chr	Position	CpG	Gene	Effect size	SE	P-value	FDR	Genomic feature	CGI background
1	4	188291712	cg15925993	LOC339975	0.529	0.066	7.33e-08	0.048	Body	open sea
2	8	26435308	cg04138376	DPYSL2	1156	0.178	1.88e-06	0.594	TSS200	CGI
3	10	71701332	cg18973932	COL13A1	-0.341	0.054	3.27e-06	0.594	Body	open sea
4	8	7246877	cg24598070		0.520	0.084	3.62e-06	0.594	Intergenic	open sea
5	2	36922639	cg15780739	VIT	0.725	0.124	8.47e-06	1	TSS1500	open sea
6	12	95943131	cg24587879	USP44	0.478	0.085	1.30e-05	1	TSS1500	S-shore
7	17	46102784	cg00712686		0.220	0.039	1.53e-05	1	Intergenic	CGI
8	2	102004087	cg07978600	CREG2	-1687	0.303	1.60e-05	1	TSS200	CGI
9	10	101292651	cg05432973	NKX2-3	-0.581	0.107	2.15e-05	1	TSS200	CGI
10	7	107243270	cg22395511	BCAP29	0.503	0.094	2.51e-05	1	Body	open sea

## Sheet: S4b
Supplementary Table S4B
Top 10 smoking-associated CpG sites in Brodmann Area 9
	Chr	Position	CpG	Gene	Effect size	SE	P-value	FDR	Genomic feature	CGI background
1	3	182981707	cg22909901	MCF2L2;B3GNT5	0.344	0.062	9.99e-07	0.652	5'UTR	open sea
2	3	60897951	cg13548862	FHIT	-0.362	0.070	4.14e-06	0.864	5'UTR	open sea
3	19	35168394	cg19850565	SCGB1B2P;ZNF302	-0.270	0.053	5.49e-06	0.864	TSS200	CGI
4	3	45928018	cg06997537	LZTFL1;CCR9	0.374	0.074	6.44e-06	0.864	5'UTR	open sea
5	4	190113944	cg00976176		0.583	0.117	7.86e-06	0.864	Intergenic	open sea
6	1	17767282	cg10582712	RCC2	0.358	0.072	7.94e-06	0.864	TSS1500	S-shore
7	2	216814839	cg16070272	MREG	-0.394	0.082	1.27e-05	0.952	Body	open sea
8	7	72727426	cg17522983	TRIM50	0.259	0.054	1.31e-05	0.952	Body	CGI
9	7	30721988	cg24214442	CRHR2	2.731	0.566	1.31e-05	0.952	1stExon	CGI
10	6	157370383	cg04721711	ARID1B	0.278	0.059	1.72e-05	1	Body	open sea

## Sheet: S4c
Supplementary Table S4C
Top 10 smoking-associated CpG sites in the caudate nucleus
	Chr	Position	CpG	Gene	Effect size	SE	P-value	FDR	Genomic feature	CGI background
1	12	52638592	cg07022048	KRT7	-0.221	0.037	2.66e-07	0.173	Body	N-shore
2	1	153203211	cg11630610		0.254	0.050	5.84e-06	1	Intergenic	open sea
3	15	70388887	cg00555828	TLE3	0.665	0.133	6.93e-06	1	Body	CGI
4	2	85932339	cg19929449		-0.254	0.054	1.67e-05	1	Intergenic	open sea
5	3	73648910	cg07321494	PDZRN3	0.447	0.097	2.88e-05	1	Body	open sea
6	22	31305461	cg12887363		0.267	0.058	3.16e-05	1	Intergenic	S-shelf
7	19	57274897	cg15666275		0.357	0.078	3.27e-05	1	Intergenic	N-shore
8	19	57657196	cg04679530	ZIM3	0.510	0.113	3.61e-05	1	TSS1500	open sea
9	9	139221176	cg10299584	DKFZP434A062;GPSM1	-0.218	0.048	3.82e-05	1	TSS1500	open sea
10	2	2672667	cg12666921		-0.358	0.079	3.87e-05	1	Intergenic	open sea

## Sheet: S4d
Supplementary Table S4D
Top 10 smoking-associated CpG sites in the putamen
	Chr	Position	CpG	Gene	Effect size	SE	P-value	FDR	Genomic feature	CGI background
1	12	27435776	cg18712580	STK38L	-0.639	0.118	1.87e-06	1	5'UTR	open sea
2	17	45882254	cg18365027		0.304	0.058	3.36e-06	1	Intergenic	open sea
3	5	68534736	cg19356322	CDK7	-0.472	0.097	1.11e-05	1	Body	S-shelf
4	9	5043263	cg03390472	JAK2	-0.544	0.112	1.11e-05	1	Body	CGI
5	3	182003594	cg17769523		-0.651	0.135	1.45e-05	1	Intergenic	open sea
6	17	37887002	cg08583059	MIEN1	0.274	0.058	1.68e-05	1	TSS1500	CGI
7	19	8571257	cg02472499		-0.301	0.065	2.24e-05	1	Intergenic	S-shore
8	7	35078206	cg06047071	DPY19L1	-0.241	0.052	2.24e-05	1	TSS1500	S-shore
9	8	42267661	cg26989007		0.504	0.108	2.34e-05	1	Intergenic	N-shore
10	7	131601354	cg08680141	LOC101928782	0.527	0.114	2.85e-05	1	Body	open sea

## Sheet: S4e
Supplementary Table S4E
Top 10 smoking-associated CpG sites in the ventral striatum
	Chr	Position	CpG	Gene	Effect size	SE	P-value	FDR	Genomic feature	CGI background
1	1	44888668	cg09139806	RNF220	-0.530	0.095	1.15e-06	0.364	Body	open sea
2	12	54145184	cg06642275	CISTR	-0.516	0.094	1.51e-06	0.364	Intergenic	CGI
3	6	31846970	cg03045620	SLC44A4	0.233	0.043	2.19e-06	0.364	TSS200	open sea
4	1	172930130	cg09124484		-0.427	0.079	2.19e-06	0.364	Intergenic	open sea
5	3	126243061	cg11572655	CHST13	0.272	0.051	2.75e-06	0.365	TSS200	CGI
6	15	88800624	cg14384532	NTRK3;NTRK3-AS1	0.216	0.041	3.74e-06	0.368	TSS1500	CGI
7	15	25320195	cg22132343	SNORD116-11	0.493	0.096	4.65e-06	0.368	TSS1500	open sea
8	22	18112710	cg23800226	ATP6V1E1	-0.546	0.106	5.11e-06	0.368	TSS1500	S-shore
9	4	143326485	cg08064687	INPP4B	-0.729	0.144	6.52e-06	0.368	Body	open sea
10	3	127396014	cg08532358	ABTB1	0.444	0.088	6.54e-06	0.368	Body	S-shelf

## Sheet: S5a
Supplementary Table S5A
Top 10 GO terms for the anterior cingulate cortex
	Ontology	Term	N	DE	P DE	FDR
1	BP	chemorepulsion of axon	6	3	4.00e-04	1
2	BP	hormone biosynthetic process	85	7	5.88e-04	1
3	BP	C21-steroid hormone biosynthetic process	26	4	8.48e-04	1
4	BP	vagus nerve morphogenesis	2	2	8.67e-04	1
5	BP	regulation of cell growth	397	18	1.09e-03	1
6	BP	sister chromatid biorientation	3	2	1.10e-03	1
7	BP	post-embryonic animal morphogenesis	11	3	1.50e-03	1
8	BP	branching involved in labyrinthine layer morphogenesis	12	3	1.53e-03	1
9	BP	gene silencing	712	15	1.97e-03	1
10	MF	activating transcription factor binding	82	7	2.18e-03	1

## Sheet: S5b
Supplementary Table S5B
Top 10 GO terms for Brodmann Area 9
	Ontology	Term	N	DE	P DE	FDR
1	BP	muscle system process	448	27.5	4.24e-04	1
2	BP	dendritic spine development	88	11	7.16e-04	1
3	BP	primary prostatic bud elongation	2	2	8.58e-04	1
4	MF	histone threonine kinase activity	7	3	1.38e-03	1
5	BP	histone-threonine phosphorylation	7	3	1.38e-03	1
6	BP	death-inducing signaling complex assembly	9	3	2.06e-03	1
7	CC	bounding membrane of organelle	1968	79	2.32e-03	1
8	BP	positive regulation of podosome assembly	10	3	2.73e-03	1
9	BP	ureter smooth muscle development	4	2	4.48e-03	1
10	BP	ureter smooth muscle cell differentiation	4	2	4.48e-03	1

[truncated: 3 more sheets: S5c, S5d, S5e]
